# Supplementary material
Source: PubMed Central journal article supplement (PMC8841393)
Supplement: sj-pdf-1-afs-10.1177_0095327X211070035.pdf [file sj-pdf-1-afs-10.1177_0095327X211070035.pdf]

## Appendix A. Military presence in pandemic relief

| <b>Cases</b>                       | <b>No. of military responding to covid</b> | <b>Total Military Size</b> | <b>% of military responding to covid</b> | <b>Level of military presence</b> |
|------------------------------------|--------------------------------------------|----------------------------|------------------------------------------|-----------------------------------|
| <b>Colombia</b>                    | 13000                                      | 293200                     | 4.43                                     | Low                               |
| <b>Mexico</b>                      | 47864                                      | 277150                     | 17.7                                     | Low                               |
| <b>Brazil</b>                      | 34000                                      | 334500                     | 10.16                                    | Low                               |
| <b>Uruguay</b>                     | 9676                                       | 56050                      | 17.26                                    | Low                               |
| <b>Paraguay</b>                    | 3000                                       | 11900                      | 25.21                                    | Low                               |
| <b>Honduras</b>                    | 4000                                       | 14950                      | 26.76                                    | Low                               |
| <b>Guatemala</b>                   | 2000                                       | 18050                      | 11.08                                    | Low                               |
| <b>Chile</b>                       | 33476                                      | 77200                      | 43.36                                    | Medium                            |
| <b>El Salvador</b>                 | 13023                                      | 24500                      | 53.16                                    | Medium                            |
| <b>Dominican Republic</b>          | 32000                                      | 56050                      | 57.09                                    | High                              |
| <b>Ecuador</b>                     | 31426                                      | 40250                      | 78.08                                    | High                              |
| <b>Peru</b>                        | 54500 <sup>1</sup>                         | 81000                      | 67.28                                    | High                              |
| <b>Argentina</b>                   | 60000                                      | 74200                      | 80.86                                    | High                              |
| <b>Bolivia</b>                     | 50000 <sup>1</sup>                         | 34100                      | 100                                      | High                              |
| <b>Regional Average Percentage</b> |                                            |                            | 42.3                                     |                                   |

Note:<sup>1</sup> Reservists were called out in Bolivia and Peru.  
Sources: See Appendix D.

### Sources for Table A1

Armed Forces of El Salvador [@FUERZARMADASV]. (2020, May 9). *13 mil 23 militares estarán trabajando en el alerta Covid-19* [Tweet]. Twitter. Retrieved from: <https://twitter.com/fuerzarmadasv>

Government of Colombia. (2020, March 24). *Fuerza Pública continúa garantizando la seguridad y la tranquilidad de los colombianos*. Retrieved from: <https://id.presidencia.gov.co/Paginas/prensa/2020/Fuerza-Publica-continua-garantizando-seguridad-tranquilidad-colombianos-emergencia-COVID-19-200324.aspx>

Government of Ecuador. (2020, March 16). *Decreto Presidencial no. 1017*. Retrieved from: [https://www.defensa.gob.ec/wp-content/uploads/downloads/2020/03/Decreto\\_presidencial\\_No\\_1017\\_17-Marzo-2020.pdf](https://www.defensa.gob.ec/wp-content/uploads/downloads/2020/03/Decreto_presidencial_No_1017_17-Marzo-2020.pdf)

Government of Bolivia. (2020, March 25). *Decreto Supremo no. 4200*. Retrieved from: [http://www.gacetaoficialdebolivia.gob.bo/normas/buscar\\_comp/\(COVID-19\)/page:3](http://www.gacetaoficialdebolivia.gob.bo/normas/buscar_comp/(COVID-19)/page:3)

Government of Guatemala. (2020, March 5). *Decreto Gubernativo no. 5*. Retrieved from:

<https://legal.dca.gob.gt/GestionDocumento/VisualizarDocumento?verDocumentoPrevia=True&versionImpresa=False&doc=55482>

- Government of Paraguay (2020, June). *Informe Oficial del Presidente Mario Abdo Benítez: al Congreso y a la Nación*.
- Government of Peru. (2020, March 24). *Decreto Supremo Que Declara Estado de Emergencia Nacional (Catalogue no. 044-2020-PCM)*. Retrieved from: <https://busquedas.elperuano.pe/normaslegales/decreto-supremo-que-declara-estado-de-emergencia-nacional-po-decreto-supremo-n-044-2020-pcm-1864948-2/.o>
- Ministry of Defense of Argentina. (2020, December 18). *Operación Belgrano II: Rossi se comunicó con los Comandantes de las Zonas de Emergencia*. Retrieved from: <https://www.argentina.gob.ar/noticias/operacion-belgrano-ii-rossi-se-comunico-con-los-comandantes-de-las-zonas-de-emergencia-de>
- Ministry of Defense of Bolivia. (2020, April 30). *Fuerzas Armadas Realizan trabajo de contención*. Retrieved from: <https://www.mindef.gob.bo/mindef/node/4064>
- Ministry of Defense of Brazil. (2020). *Após 60 dias de operação*. Retrieved from <https://www.defesa.gov.br/noticias/69215-apos-60-dias-de-operacao-forcas-armadas-se-mantem-atuantes-no-combate-a-covid-19>
- Ministry of Defense of Chile. (2020a, April 14). *Plan de Acción Covid-19*. Retrieved from <https://www.defensa.cl/noticias/plan-de-accion-covid-19-ffaa-colaboraran-en-la-distribucion-de-kits-preventivos-en-263-campamentos/>
- Ministry of Defense of Chile (2020b, April 21). *Ministros de Defensa Nacional y del Interior entregan balance*. Retrieved from: <https://www.defensa.cl/noticias/ministros-de-defensa-nacional-y-del-interior-entregan-balance/>
- Ministry of Defense of Honduras. (2020, March 19). *FUSINA doblega puntos de control*. Retrieved from: <https://sedena.gob.hn/2020/03/19/fusina-doblega-puntos-de-control-para-evitar-propagacion-de-covid-19/>
- Ministry of Defense of Uruguay. (2020, June 24). *Más de 9600 efectivos de las Fuerzas Armadas dedicados a atender la emergencia*. Retrieved from: <https://www.gub.uy/ministerio-defensa-nacional/comunicacion/noticias/9600-efectivos-fuerzas-armadas-dedicados-atender-emergencia-covid-19>
- Ministry of Defense of Mexico. (2020, July 20). *Las Fuerzas Armadas y La Guardia Nacional despliegan más de 173,000 elementos*. Retrieved from: <https://www.gob.mx/sedena/prensa/las-fuerzas-armadas-y-la-guardia-nacional-despliegan-mas-de-173-000-elementos-en-todo-el-territorio-nacional>
- Navarro, C. A. G., & Mandujano, M. A. M. (2019, January). La participación del Ejército en labores de protección a la población: el caso del Plan DN-III-E, no 45. *Instituto Belisario Domínguez*, Senado de la República
- Opinión. (2021, May 21). Dan ascenso y seguro médico a 50,000 soldados que luchan contra el Covid-19. *Opinión*. Retrieved from: <https://www.opinion.com.bo/articulo/pais/dan-ascenso-seguro-medico-50000-soldados-luchan-covid-19/20200501011539765276.html>
- Peruvian Armed Forces. (2020). *Comando en Acción no. 70*. Retrieved from: <http://www.ccffaa.mil.pe/wpcontent/uploads/2020/07/Comando-en-Accion-70-COVID-web.pdf>

- Rivera, N. (2021, January 21). Guatemala responde con violencia a la crisis migratoria. *Desinformémonos*, 21 January. Retrieved from: <https://desinformemonos.org/guatemala-responde-con-violencia-a-la-crisis-migratoria/>
- The Military Balance. (2020). *The Military Balance*, 120(1): 388-443.
- Urbaes, P. (2020, August 22). Abinader comienza a reforzar patrullaje con 21,300 agentes. *Listín Diario*, 22 August. Retrieved from: <https://listindiario.com/la-republica/2020/08/22/631898/abinader-comienza-a-reforzar-patrullaje-con-21300-agentes>

## **Appendix B. Military political autonomy, qualitative assessments**

**Argentina – Autonomy is low** since the move back to democracy in 1984. The military must answer to a MOD heavily controlled by civilians; defense plans, and policy receive military input, but final decisions are made by civilians. The military's primary mission has been confined to external defense and has an internal security role only in exceptional circumstances; its budgets have been cut severely, and its educational system has been transformed on orders of civilians, resulting in more integration with the university system and democratic values.

**Chile- Autonomy is moderately low.** Military has lost considerable autonomy since the Pinochet days and the transition to democratic rule. It has lost clout on the National Security Council, cannot interfere in public policy, answers to civilian courts when human rights abuses have been committed, has lost its institutional control over the police, and is under the authority of a defense ministry that is headed by civilians. Laws now distinguish between defense-which is the military's purview, and internal security-which is the responsibility of the police. Some areas of autonomy remain. The Chilean armed forces retain control over the ownership and management of defense enterprises. It also weighs in heavily in the formulation of defense plans and policy within the defense ministry and is by law granted considerable powers during states of catastrophe.

**Brazil-Autonomy is high:** Advances were made since the country became a democracy. In 1999 it established a civilian-led defense ministry and defense reforms were enacted in the 2010 decade that granted to civilians in defense policymaking. Yet, since 2017, civilian control has been seriously backsliding and not only generals have the leadership over the defense ministry, but also occupy a considerable share of the cabinet since 2019. There is an unprecedented number of active-duty officers in ministries with the consent of the branch commanders. Generals have publicly displayed support to the president in political gatherings. The military's decision-making latitude extends beyond defense. The constitution authorizes military involvement in law-and-order operations, has contested public policies—outside of the defense realm-- it does not like, has increasingly dominated key positions within the defense ministry and has sway over the management of state-owned defense firms.

**El Salvador-Autonomy is high.** Following the 1992 Peace Accords, certain reforms strengthened civilian control. The armed forces were separated from the police, and their internal intelligence gathering powers, used previously for repression of Salvadoran citizens, were stripped away. To reform professional norms there were efforts to incorporate civilian educators and curriculum into the academies. That having been said, while laws and regulations have been passed, there was a general failure on the part of both the ARENA (Nationalist Republican Alliance) and FMLN (Farabundo Martí National Liberation Front) governments and now the Bukele administration, to actualize them. Instead, they have delegated powers to the El Salvador armed forces. The military dominates the defense ministry, and defense planning; officers were appointed to head up the Ministry of Justice and Public Security as well as the Civilian National Police; and without any strategic guidance from the political authorities, the military and police

have been left to autonomously respond to the organized crime threat, with substantial evidence of human rights violations. Without civilian leadership, interagency planning and coordination has been deficient.

### Appendix. C. Scoring of the Cases

**Table C1. Scoring of the cases at the first stage of our research**

| <b>Cases/Variables</b>    | <b>Presence Score</b> | <b>Military in Pandemic Public Security?</b> | <b>Military Operational Autonomy in the Covid Response</b> | <b>Expected Military Human Rights Violations</b> | <b>Actual Level of Military Human Rights Violations</b> | <b>Typical or Unexpected ?</b> |
|---------------------------|-----------------------|----------------------------------------------|------------------------------------------------------------|--------------------------------------------------|---------------------------------------------------------|--------------------------------|
| <b>Argentina</b>          | 3                     | 0                                            | 0                                                          | Low                                              | Low                                                     | <b>Typical (selected)</b>      |
| <b>Bolivia</b>            | 3                     | 1                                            | 3                                                          | High                                             | Medium                                                  | Unexpected                     |
| <b>Brazil</b>             | 1                     | 0                                            | 3                                                          | Medium                                           | Low                                                     | <b>Unexpected (selected)</b>   |
| <b>Chile</b>              | 2                     | 1                                            | 2                                                          | High                                             | Low                                                     | <b>Unexpected (selected)</b>   |
| <b>Colombia</b>           | 1                     | 0                                            | 1                                                          | Low                                              | Low                                                     | Typical                        |
| <b>Dominican Republic</b> | 3                     | 1                                            | 3                                                          | High                                             | High                                                    | Typical                        |
| <b>Ecuador</b>            | 3                     | 1                                            | 3                                                          | High                                             | High                                                    | Typical                        |
| <b>El Salvador</b>        | 2                     | 1                                            | 3                                                          | High                                             | High                                                    | <b>Typical (selected)</b>      |
| <b>Guatemala</b>          | 1                     | 1                                            | 2                                                          | Medium                                           | Medium                                                  | Typical                        |
| <b>Honduras</b>           | 1                     | 0                                            | 3                                                          | Medium                                           | Medium                                                  | Typical                        |
| <b>Mexico</b>             | 1                     | 0                                            | 1                                                          | Low                                              | Low                                                     | Typical                        |
| <b>Paraguay</b>           | 1                     | 1                                            | 2                                                          | Medium                                           | High                                                    | Unexpected                     |
| <b>Peru</b>               | 3                     | 1                                            | 3                                                          | High                                             | Medium                                                  | Unexpected                     |
| <b>Uruguay</b>            | 1                     | 0                                            | 0                                                          | Low                                              | Low                                                     | Typical                        |

Note: Presence is coded is scaled 1-3 with 3 representing higher levels, based on the information on table A1. Military Operational autonomy is scaled 0-3 with 3 representing higher levels.

Operational autonomy was measured by answering the following five questions: Are states of emergency enacted to grant more autonomy to the military? Do policing substantially involve the military? Must the military coordinate with non-military agencies? Does the chain of command begin and end with the military or is it civilian controlled or mediated? Is there civilian oversight on military operations? Our framework predicted 9/14 cases (64%).
